# Supplementary material for: Learning the properties of adaptive regions with functional data analysis
Source: PubMed Central journal article supplement (PMC7480868; doi:10.1371/journal.pgen.1008896), 2020-08-27
Supplement: pgen.1008896.s002.pdf [file pgen.1008896.s002.pdf]

Table S2: Root mean squared error (RMSE) and mean absolute error (MAE) values when predicting selection coefficient ( $s$ ), initial frequency ( $f$ ), and time of selection ( $T_{\text{sel}}$ ) for YRI and CEU populations. The values show RMSE and MAE measured between log-scaled predicted and actual parameters after unstandardizing.

| Population | RMSE( $s$ ) | RMSE( $f$ ) | RMSE( $T_{\text{sel}}$ ) | MAE( $s$ ) | MAE( $f$ ) | MAE( $T_{\text{sel}}$ ) |
|------------|-------------|-------------|--------------------------|------------|------------|-------------------------|
| CEU        | 0.49        | 0.43        | 20.34                    | 0.40       | 0.35       | 18.02                   |
| YRI        | 0.47        | 0.45        | 24.49                    | 0.41       | 0.38       | 20.13                   |
