# Supplementary material for: Learning the properties of adaptive regions with functional data analysis
Source: PubMed Central journal article supplement (PMC7480868; doi:10.1371/journal.pgen.1008896), 2020-08-27
Supplement: pgen.1008896.s003.pdf [file pgen.1008896.s003.pdf]

Table S3: Root mean squared error (RMSE) and mean absolute error (MAE) values when predicting selection coefficient ( $s$ ), initial frequency ( $f$ ), and time of selection ( $T_{\text{sel}}$ ) for YRI and CEU populations tested on simulations of missing data. The values show RMSE and MAE measured between standardized log-scaled predicted and actual parameters in simulated data.

| Population | RMSE( $s$ ) | RMSE( $f$ ) | RMSE( $T_{\text{sel}}$ ) | MAE( $s$ ) | MAE( $f$ ) | MAE( $T_{\text{sel}}$ ) |
|------------|-------------|-------------|--------------------------|------------|------------|-------------------------|
| CEU        | 0.93        | 1.03        | 0.87                     | 0.83       | 0.94       | 0.77                    |
| YRI        | 1.12        | 1.11        | 1.21                     | 0.99       | 0.94       | 1.03                    |
