# Supplementary material for: Learning the properties of adaptive regions with functional data analysis
Source: PubMed Central journal article supplement (PMC7480868; doi:10.1371/journal.pgen.1008896), 2020-08-27
Supplement: pgen.1008896.s004.pdf [file pgen.1008896.s004.pdf]

Table S4: Root mean squared error (RMSE) and mean absolute error (MAE) values when predicting selection coefficient ( $s$ ), initial frequency ( $f$ ), and time of selection ( $T_{\text{sel}}$ ) for YRI and CEU populations tested on simulations of missing data. The values show RMSE and MAE measured between log-scaled predicted and actual parameters after unstandardizing.

| Population | RMSE( $s$ ) | RMSE( $f$ ) | RMSE( $T_{\text{sel}}$ ) | MAE( $s$ ) | MAE( $f$ ) | MAE( $T_{\text{sel}}$ ) |
|------------|-------------|-------------|--------------------------|------------|------------|-------------------------|
| CEU        | 0.51        | 0.49        | 23.82                    | 0.37       | 0.40       | 19.65                   |
| YRI        | 0.56        | 0.50        | 37.07                    | 0.42       | 0.46       | 30.09                   |
