# Supplementary material for: Learning the properties of adaptive regions with functional data analysis
Source: PubMed Central journal article supplement (PMC7480868; doi:10.1371/journal.pgen.1008896), 2020-08-27
Supplement: pgen.1008896.s006.pdf [file pgen.1008896.s006.pdf]

Table S6: Root mean squared error (RMSE) and mean absolute error (MAE) values when predicting selection coefficient ( $s$ ), initial frequency ( $f$ ), and time of selection ( $T_{\text{sel}}$ ) for YRI and CEU populations when tested with models trained with simulations of the opposite demography. The values show RMSE and MAE measured between log-scaled predicted and actual parameters after unstandardizing.

| Population | RMSE( $s$ ) | RMSE( $f$ ) | RMSE( $T_{\text{sel}}$ ) | MAE( $s$ ) | MAE( $f$ ) | MAE( $T_{\text{sel}}$ ) |
|------------|-------------|-------------|--------------------------|------------|------------|-------------------------|
| CEU        | 0.50        | 0.51        | 26.80                    | 0.44       | 0.50       | 20.11                   |
| YRI        | 0.51        | 0.53        | 34.86                    | 0.43       | 0.45       | 28.49                   |
