# Supplementary material for: Learning the properties of adaptive regions with functional data analysis
Source: PubMed Central journal article supplement (PMC7480868; doi:10.1371/journal.pgen.1008896), 2020-08-27
Supplement: pgen.1008896.s010.pdf [file pgen.1008896.s010.pdf]

Table S10: Root mean squared error (RMSE) and mean absolute error (MAE) values when predicting selection coefficient ( $s$ ), initial frequency ( $f$ ), and time of selection ( $T_{\text{sel}}$ ) for CEU populations when trained and tested with simulations sampling  $n = 20, 50, \text{ or } 200$  haploid genomes. The values show RMSE and MAE measured between standardized log-scaled predicted and actual parameters.

| Number of haploids ( $n$ ) | RMSE( $s$ ) | RMSE( $f$ ) | RMSE( $T_{\text{sel}}$ ) | MAE( $s$ ) | MAE( $f$ ) | MAE( $T_{\text{sel}}$ ) |
|----------------------------|-------------|-------------|--------------------------|------------|------------|-------------------------|
| 20                         | 1.00        | 1.04        | 0.74                     | 0.82       | 0.89       | 0.63                    |
| 50                         | 0.93        | 1.01        | 0.69                     | 0.80       | 0.83       | 0.55                    |
| 200                        | 0.89        | 0.94        | 0.67                     | 0.71       | 0.80       | 0.54                    |
