# Supplementary material for: Learning the properties of adaptive regions with functional data analysis
Source: PubMed Central journal article supplement (PMC7480868; doi:10.1371/journal.pgen.1008896), 2020-08-27
Supplement: pgen.1008896.s011.pdf [file pgen.1008896.s011.pdf]

Table S11: Root mean squared error (RMSE) and mean absolute error (MAE) values when predicting selection coefficient ( $s$ ), initial frequency ( $f$ ), and time of selection ( $T_{\text{sel}}$ ) for CEU populations when trained and tested with simulations using recombination rate drawn from an exponential distribution with mean  $10^{-8}$  truncated at three times the mean per site per generation or rate drawn from an empirical human recombination map. The values show RMSE and MAE measured between standardized log-scaled predicted and actual parameters.

| Recombination rate | RMSE( $s$ ) | RMSE( $f$ ) | RMSE( $T_{\text{sel}}$ ) | MAE( $s$ ) | MAE( $f$ ) | MAE( $T_{\text{sel}}$ ) |
|--------------------|-------------|-------------|--------------------------|------------|------------|-------------------------|
| $10^{-8}$          | 0.88        | 1.02        | 0.69                     | 0.68       | 0.82       | 0.51                    |
| Human map          | 0.96        | 1.11        | 0.84                     | 0.83       | 0.93       | 0.68                    |
