# Supplementary material for: Learning the properties of adaptive regions with functional data analysis
Source: PubMed Central journal article supplement (PMC7480868; doi:10.1371/journal.pgen.1008896), 2020-08-27
Supplement: pgen.1008896.s012.pdf [file pgen.1008896.s012.pdf]

Table S12: Root mean squared error (RMSE) and mean absolute error (MAE) values when predicting selection coefficient ( $s$ ), initial frequency ( $f$ ), and time of selection ( $T_{\text{sel}}$ ) for YRI and CEU populations when tested with simulations of selective sweeps with  $f \in [0.1, 0.2]$ . The values show RMSE and MAE measured between standardized log-scaled predicted and actual parameters.

| Population | RMSE( $s$ ) | RMSE( $f$ ) | RMSE( $T_{\text{sel}}$ ) | MAE( $s$ ) | MAE( $f$ ) | MAE( $T_{\text{sel}}$ ) |
|------------|-------------|-------------|--------------------------|------------|------------|-------------------------|
| CEU        | 1.02        | 1.43        | 0.81                     | 0.98       | 1.31       | 0.79                    |
| YRI        | 1.19        | 1.32        | 0.86                     | 1.05       | 1.24       | 0.95                    |
