# Supplementary material for: Learning the properties of adaptive regions with functional data analysis
Source: PubMed Central journal article supplement (PMC7480868; doi:10.1371/journal.pgen.1008896), 2020-08-27
Supplement: pgen.1008896.s013.pdf [file pgen.1008896.s013.pdf]

Table S13: Root mean squared error (RMSE) and mean absolute error (MAE) values when predicting selection coefficient ( $s$ ), initial frequency ( $f$ ), and time of donor-recipient split ( $T_{\text{split}}$ ) under adaptive introgression scenarios for YRI and CEU populations. The values show RMSE and MAE measured between standardized log-scaled predicted and actual parameters in simulated data.

| Population | RMSE( $s$ ) | RMSE( $f$ ) | RMSE( $T_{\text{split}}$ ) | MAE( $s$ ) | MAE( $f$ ) | MAE( $T_{\text{sel}}$ ) |
|------------|-------------|-------------|----------------------------|------------|------------|-------------------------|
| CEU        | 0.93        | 1.00        | 0.98                       | 0.91       | 0.96       | 0.94                    |
| YRI        | 0.97        | 0.91        | 0.99                       | 0.93       | 0.88       | 0.95                    |
