# Supplementary material for: Learning the properties of adaptive regions with functional data analysis
Source: PubMed Central journal article supplement (PMC7480868; doi:10.1371/journal.pgen.1008896), 2020-08-27
Supplement: pgen.1008896.s014.pdf [file pgen.1008896.s014.pdf]

Table S14: Classification of CEU data with classifier trained to differentiate sweeps and neutrality,  $\gamma = 1$ , Level 1 chosen through cross validation (see *Training the models*), Daubechies' least asymmetric wavelets

| Chromosome | Neutral | Sweep | $\mathbb{P}[\text{Sweep}] > 0.7$ |
|------------|---------|-------|----------------------------------|
| 1          | 88.0    | 12.0  | 6.9                              |
| 2          | 85.8    | 14.2  | 7.8                              |
| 3          | 88.8    | 11.2  | 6.3                              |
| 4          | 86.6    | 13.4  | 8.5                              |
| 5          | 90.2    | 9.8   | 5.1                              |
| 6          | 89.8    | 10.2  | 5.3                              |
| 7          | 87.5    | 12.5  | 7.0                              |
| 8          | 85.7    | 14.3  | 7.7                              |
| 9          | 83.9    | 16.1  | 8.9                              |
| 10         | 87.2    | 12.8  | 6.9                              |
| 11         | 88.4    | 11.6  | 7.2                              |
| 12         | 86.2    | 13.8  | 7.9                              |
| 13         | 91.6    | 8.4   | 4.2                              |
| 14         | 86.4    | 13.6  | 7.7                              |
| 15         | 79.4    | 20.6  | 11.8                             |
| 16         | 80.6    | 19.4  | 11.0                             |
| 17         | 86.4    | 13.6  | 7.5                              |
| 18         | 85.1    | 14.9  | 8.7                              |
| 19         | 79.4    | 20.6  | 10.7                             |
| 20         | 82.8    | 17.2  | 10.0                             |
| 21         | 89.4    | 10.6  | 6.2                              |
| 22         | 84.4    | 15.6  | 6.5                              |
