# Supplementary material for: Learning the properties of adaptive regions with functional data analysis
Source: PubMed Central journal article supplement (PMC7480868; doi:10.1371/journal.pgen.1008896), 2020-08-27
Supplement: pgen.1008896.s015.pdf [file pgen.1008896.s015.pdf]

Table S15: Classification of YRI data with classifier trained to differentiate sweeps and neutrality,  $\gamma = 1$ , Level 1 chosen through cross validation (see *Training the models*), Daubechies' least asymmetric wavelets

| Chromosome | Neutral | Sweep | $\mathbb{P}[\text{Sweep}] > 0.7$ |
|------------|---------|-------|----------------------------------|
| 1          | 97.1    | 2.9   | 2.0                              |
| 2          | 97.8    | 2.2   | 1.4                              |
| 3          | 98.2    | 1.8   | 1.1                              |
| 4          | 96.6    | 3.4   | 2.0                              |
| 5          | 97.2    | 2.8   | 1.7                              |
| 6          | 95.2    | 4.8   | 3.4                              |
| 7          | 96.1    | 3.9   | 2.5                              |
| 8          | 97.5    | 2.5   | 1.7                              |
| 9          | 97.2    | 2.8   | 1.9                              |
| 10         | 96.9    | 3.1   | 1.9                              |
| 11         | 96.7    | 3.3   | 1.8                              |
| 12         | 97.4    | 2.6   | 1.9                              |
| 13         | 98.2    | 1.8   | 0.9                              |
| 14         | 97.2    | 2.8   | 1.3                              |
| 15         | 97.9    | 2.1   | 1.3                              |
| 16         | 95.8    | 4.2   | 3.0                              |
| 17         | 97.7    | 2.3   | 1.5                              |
| 18         | 98.2    | 1.8   | 1.1                              |
| 19         | 94.3    | 5.7   | 3.8                              |
| 20         | 97.5    | 2.5   | 2.0                              |
| 21         | 97.6    | 2.4   | 1.2                              |
| 22         | 98.5    | 1.5   | 1.1                              |
