# Supplementary material for: Learning the properties of adaptive regions with functional data analysis
Source: PubMed Central journal article supplement (PMC7480868; doi:10.1371/journal.pgen.1008896), 2020-08-27
Supplement: pgen.1008896.s016.pdf [file pgen.1008896.s016.pdf]

Table S16: Classification of CEU data with classifier trained to differentiate adaptive introgression, sweeps, and neutrality,  $\gamma = 1$ , Level 1 chosen through cross validation (see *Training the models*), Daubechies' least asymmetric wavelets

| Chromosome | Neutral | Introgression sweep | Sweep | $\mathbb{P}[\text{Introgression sweep}] > 0.6$ | $\mathbb{P}[\text{Sweep}] > 0.6$ |
|------------|---------|---------------------|-------|------------------------------------------------|----------------------------------|
| 1          | 87.4    | 4.0                 | 8.6   | 0.3                                            | 1.6                              |
| 2          | 85.7    | 4.7                 | 9.6   | 0.4                                            | 0.4                              |
| 3          | 88.4    | 3.9                 | 7.8   | 0.3                                            | 0.5                              |
| 4          | 85.2    | 6.3                 | 8.5   | 0.9                                            | 1.1                              |
| 5          | 90.2    | 2.7                 | 7.1   | 0.1                                            | 0.5                              |
| 6          | 88.9    | 3.8                 | 7.4   | 0.2                                            | 0.6                              |
| 7          | 87.8    | 3.1                 | 9.2   | 0.1                                            | 0.6                              |
| 8          | 84.4    | 5.6                 | 10.0  | 0.2                                            | 1.2                              |
| 9          | 85.2    | 3.5                 | 11.2  | 0.2                                            | 0.7                              |
| 10         | 86.7    | 5.1                 | 8.2   | 0.5                                            | 0.7                              |
| 11         | 88.5    | 3.3                 | 8.1   | 0.1                                            | 0.9                              |
| 12         | 86.8    | 3.3                 | 9.9   | 0.3                                            | 0.4                              |
| 13         | 91.4    | 3.3                 | 5.3   | 0.0                                            | 0.3                              |
| 14         | 86.9    | 3.2                 | 9.9   | 0.0                                            | 0.5                              |
| 15         | 79.4    | 5.7                 | 14.9  | 0.3                                            | 1.6                              |
| 16         | 81.6    | 5.0                 | 13.4  | 0.2                                            | 2.1                              |
| 17         | 87.0    | 5.2                 | 7.8   | 0.2                                            | 0.3                              |
| 18         | 85.3    | 5.8                 | 8.9   | 0.1                                            | 0.9                              |
| 19         | 82.5    | 4.0                 | 13.5  | 0.0                                            | 0.9                              |
| 20         | 83.6    | 4.5                 | 11.9  | 0.0                                            | 0.6                              |
| 21         | 88.3    | 6.2                 | 5.6   | 0.2                                            | 0.1                              |
| 22         | 86.1    | 2.9                 | 11.0  | 0.0                                            | 0.1                              |
