# Supplementary material for: Learning the properties of adaptive regions with functional data analysis
Source: PubMed Central journal article supplement (PMC7480868; doi:10.1371/journal.pgen.1008896), 2020-08-27
Supplement: pgen.1008896.s017.pdf [file pgen.1008896.s017.pdf]

Table S17: Classification of CEU data with classifier trained to differentiate adaptive introgression, sweeps, and neutrality,  $\gamma = 1$ , Level 1 chosen through cross validation (see *Training the models*), Daubechies' least asymmetric wavelets, including two-dimensional statistics

| Chromosome | Neutral | Introgression sweep | Sweep | $\mathbb{P}[\text{Introgression sweep}] > 0.6$ | $\mathbb{P}[\text{Sweep}] > 0.6$ |
|------------|---------|---------------------|-------|------------------------------------------------|----------------------------------|
| 1          | 90.5    | 3.5                 | 6.1   | 0.5                                            | 2.3                              |
| 2          | 90.3    | 4.7                 | 5.1   | 1.0                                            | 1.4                              |
| 3          | 91.4    | 4.3                 | 4.3   | 0.9                                            | 1.1                              |
| 4          | 87.4    | 6.0                 | 6.6   | 1.5                                            | 2.1                              |
| 5          | 93.2    | 3.4                 | 3.4   | 0.7                                            | 0.7                              |
| 6          | 92.8    | 2.9                 | 4.3   | 0.6                                            | 1.3                              |
| 7          | 92.8    | 2.7                 | 4.4   | 0.4                                            | 0.9                              |
| 8          | 88.0    | 4.9                 | 7.0   | 0.8                                            | 1.7                              |
| 9          | 90.9    | 3.8                 | 5.3   | 0.7                                            | 1.1                              |
| 10         | 92.0    | 3.9                 | 4.2   | 1.1                                            | 0.8                              |
| 11         | 92.2    | 3.8                 | 4.0   | 0.6                                            | 1.3                              |
| 12         | 92.2    | 2.7                 | 5.1   | 0.6                                            | 1.1                              |
| 13         | 93.7    | 2.9                 | 3.3   | 0.3                                            | 0.3                              |
| 14         | 91.3    | 3.7                 | 5.0   | 0.7                                            | 1.9                              |
| 15         | 89.4    | 4.7                 | 5.9   | 0.8                                            | 1.4                              |
| 16         | 93.0    | 3.1                 | 3.9   | 0.3                                            | 0.7                              |
| 17         | 93.4    | 3.0                 | 3.6   | 0.4                                            | 0.8                              |
| 18         | 90.1    | 5.5                 | 4.4   | 1.4                                            | 0.8                              |
| 19         | 89.9    | 3.2                 | 6.9   | 0.3                                            | 1.2                              |
| 20         | 90.3    | 4.6                 | 5.1   | 0.3                                            | 0.9                              |
| 21         | 90.9    | 4.4                 | 4.7   | 0.7                                            | 0.8                              |
| 22         | 94.4    | 3.8                 | 1.8   | 0.3                                            | 0.0                              |
