# Supplementary material for: Learning the properties of adaptive regions with functional data analysis
Source: PubMed Central journal article supplement (PMC7480868; doi:10.1371/journal.pgen.1008896), 2020-08-27
Supplement: pgen.1008896.s018.pdf [file pgen.1008896.s018.pdf]

Table S18: Classification of YRI data with classifier trained to differentiate adaptive introgression, sweeps, and neutrality,  $\gamma = 1$ , Level 1 chosen through cross validation (see *Training the models*), Daubechies' least asymmetric wavelets

| Chromosome | Neutral | Introgression sweep | Sweep | $\mathbb{P}[\text{Introgression sweep}] > 0.6$ | $\mathbb{P}[\text{Sweep}] > 0.6$ |
|------------|---------|---------------------|-------|------------------------------------------------|----------------------------------|
| 1          | 96.9    | 0.3                 | 2.8   | 0.1                                            | 0.7                              |
| 2          | 96.9    | 0.1                 | 2.9   | 0.0                                            | 0.8                              |
| 3          | 97.7    | 0.3                 | 2.0   | 0.0                                            | 0.6                              |
| 4          | 96.3    | 0.5                 | 3.2   | 0.2                                            | 0.6                              |
| 5          | 96.6    | 0.2                 | 3.2   | 0.0                                            | 1.0                              |
| 6          | 95.5    | 1.8                 | 2.8   | 0.8                                            | 0.5                              |
| 7          | 96.1    | 0.3                 | 3.6   | 0.0                                            | 1.0                              |
| 8          | 97.3    | 0.1                 | 2.7   | 0.0                                            | 0.8                              |
| 9          | 96.8    | 0.3                 | 2.9   | 0.1                                            | 0.5                              |
| 10         | 97.0    | 0.7                 | 2.3   | 0.0                                            | 0.3                              |
| 11         | 96.5    | 0.4                 | 3.1   | 0.0                                            | 0.9                              |
| 12         | 97.3    | 0.2                 | 2.4   | 0.0                                            | 0.7                              |
| 13         | 98.2    | 0.3                 | 1.6   | 0.0                                            | 0.3                              |
| 14         | 96.9    | 0.1                 | 3.0   | 0.0                                            | 0.9                              |
| 15         | 97.5    | 0.0                 | 2.5   | 0.0                                            | 0.9                              |
| 16         | 95.4    | 0.7                 | 3.9   | 0.2                                            | 0.9                              |
| 17         | 97.7    | 0.7                 | 1.6   | 0.2                                            | 0.3                              |
| 18         | 97.9    | 0.6                 | 1.5   | 0.0                                            | 0.4                              |
| 19         | 94.8    | 0.8                 | 4.4   | 0.0                                            | 1.2                              |
| 20         | 97.5    | 0.6                 | 1.9   | 0.0                                            | 0.5                              |
| 21         | 98.5    | 0.4                 | 1.2   | 0.0                                            | 0.0                              |
| 22         | 98.3    | 0.6                 | 1.1   | 0.0                                            | 0.2                              |
