# Supplementary material for: Learning the properties of adaptive regions with functional data analysis
Source: PubMed Central journal article supplement (PMC7480868; doi:10.1371/journal.pgen.1008896), 2020-08-27
Supplement: pgen.1008896.s020.pdf [file pgen.1008896.s020.pdf]

Table S20: Runtime comparison when training *SURFDAWave* (Daubechies' least-asymmetric wavelets), *Trendsetter* (linear trend filtering), diploS/HIC, and evolBoosting with 5000 simulations each when differentiating between sweeps and neutrality. All estimates assume that feature vectors have already been computed for each method.

| Classification method | Time             |
|-----------------------|------------------|
| <i>SURFDAWave</i>     | 1434.72 seconds  |
| <i>Trendsetter</i>    | 10328.74 seconds |
| diploS/HIC            | 187.19 seconds   |
| evolBoosting          | 14.99 seconds    |
