# Supplementary material for: Learning the properties of adaptive regions with functional data analysis
Source: PubMed Central journal article supplement (PMC7480868; doi:10.1371/journal.pgen.1008896), 2020-08-27
Supplement: pgen.1008896.s022.pdf [file pgen.1008896.s022.pdf]

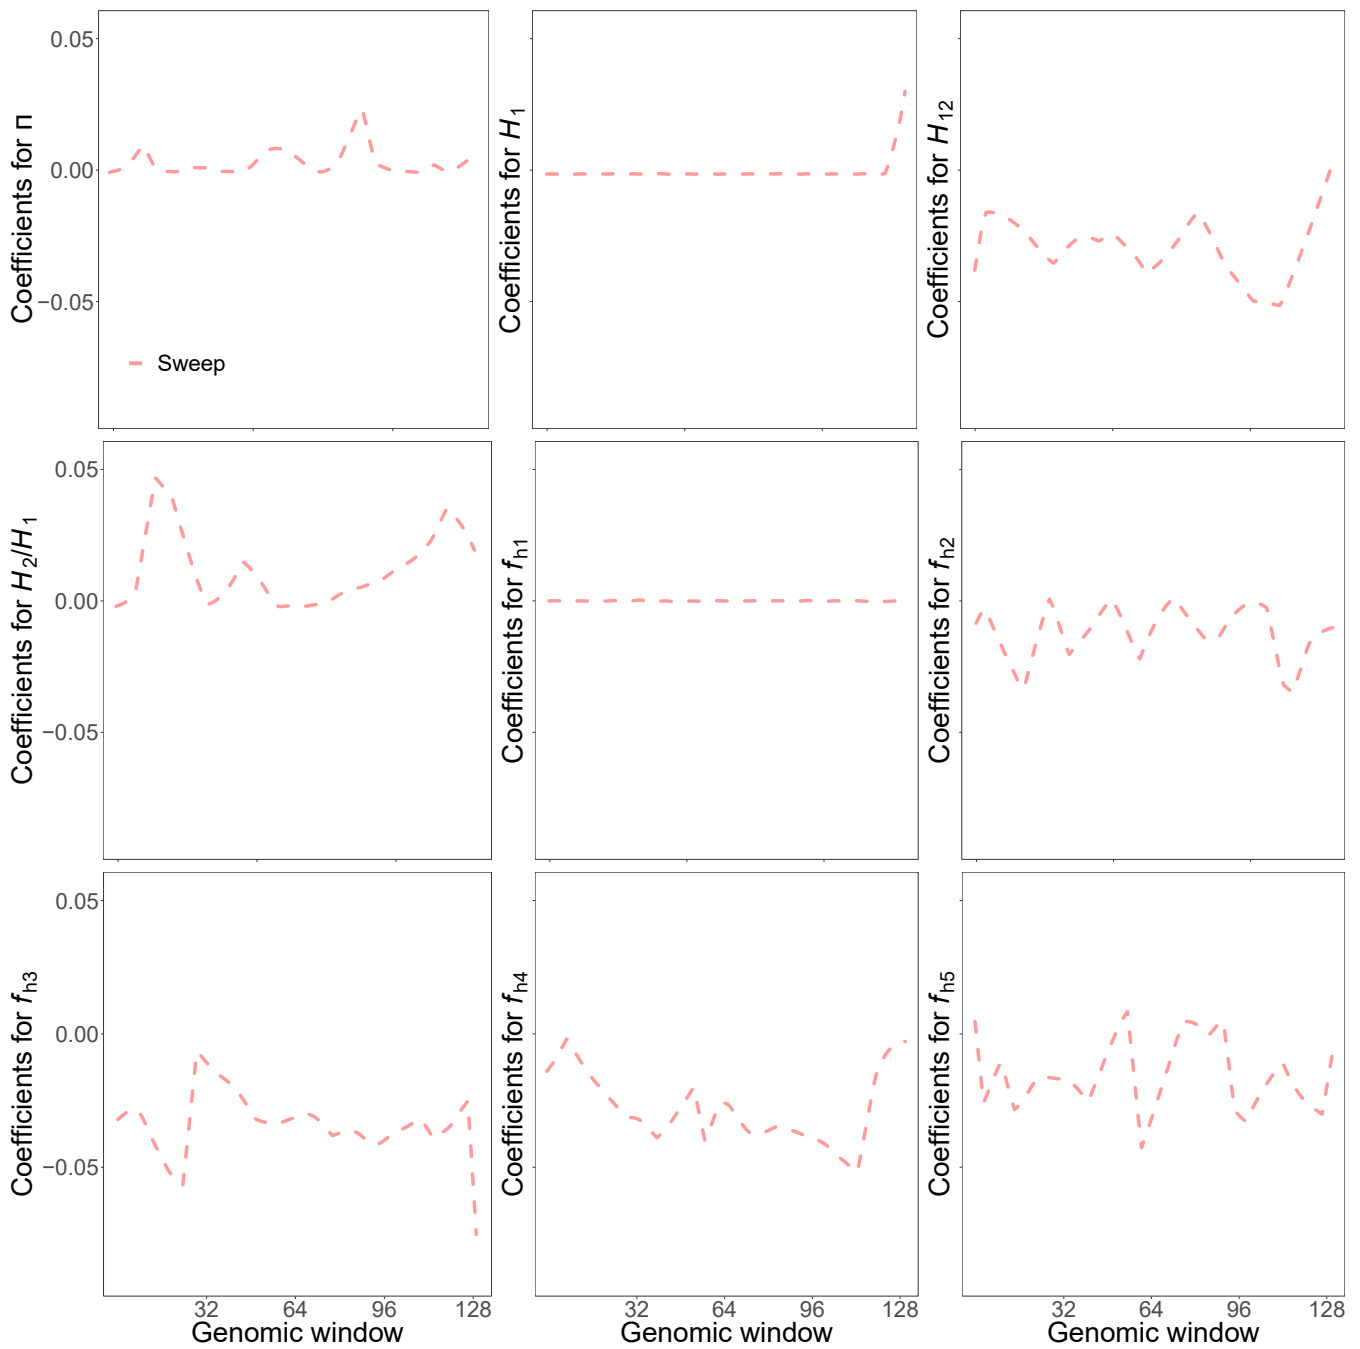

Figure S2: Spatial distribution of regression coefficients ( $\beta$ s) in sweep scenarios for summary statistics  $H_1$ ,  $H_{12}$ ,  $H_2/H_1$ , and frequencies of first to sixth most common haplotypes for *Trendsetter* with a linear  $d = 2$  trend penalty. *Trendsetter* was trained on simulations of constant demographic history.
