# Supplementary material for: Learning the properties of adaptive regions with functional data analysis
Source: PubMed Central journal article supplement (PMC7480868; doi:10.1371/journal.pgen.1008896), 2020-08-27
Supplement: pgen.1008896.s023.pdf [file pgen.1008896.s023.pdf]

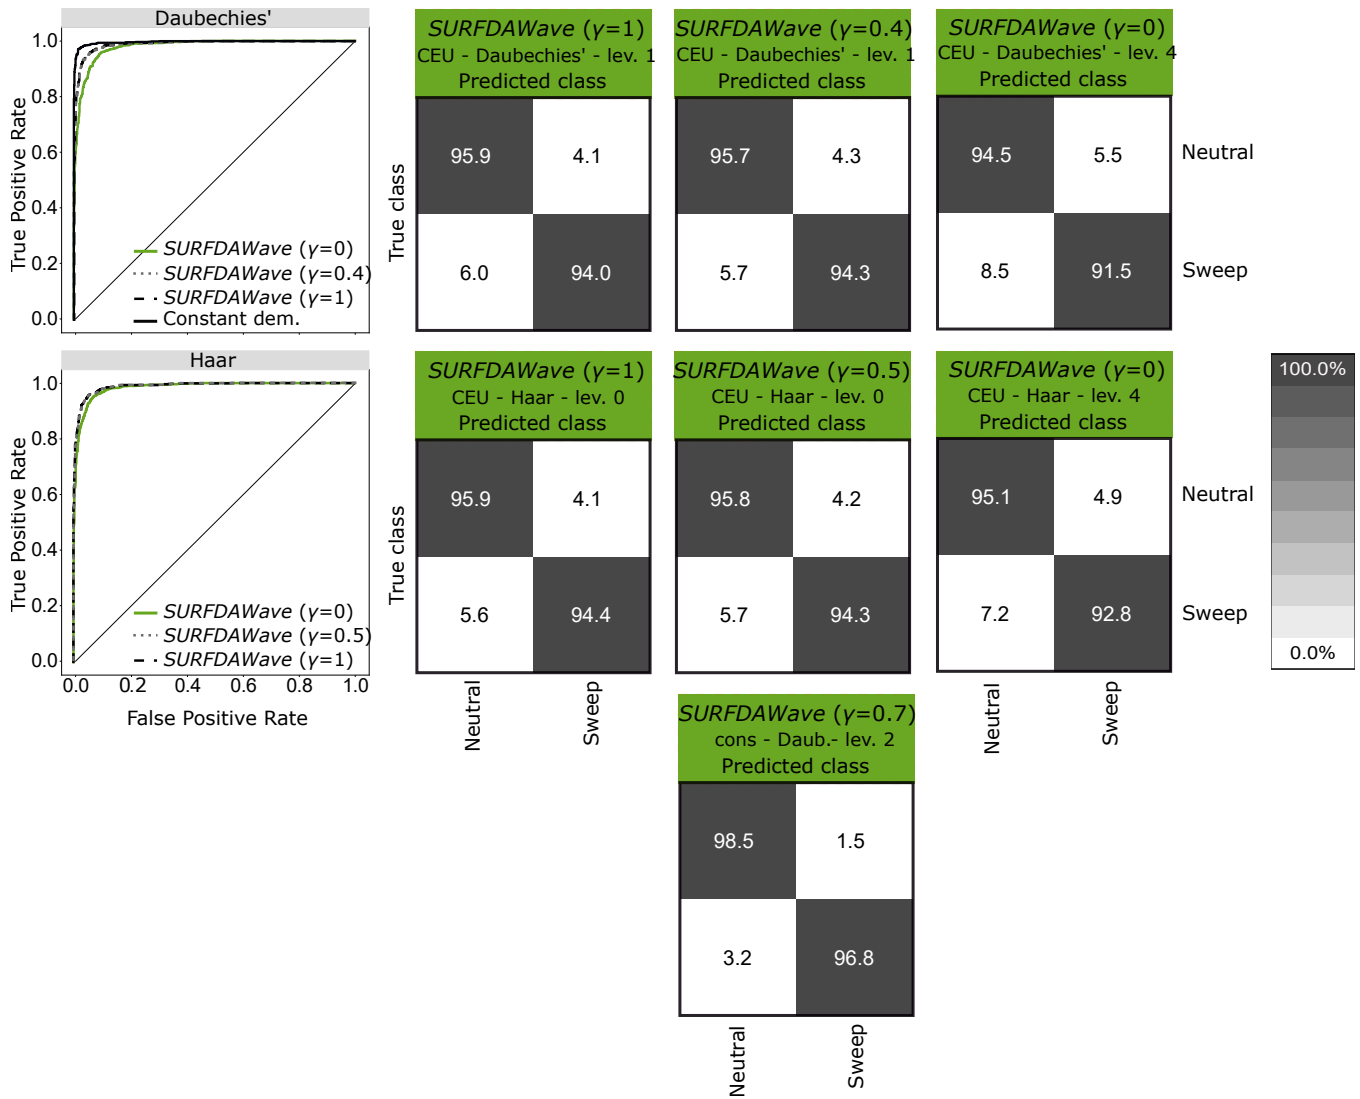

Figure S3: *SURFDAWave* classifier performance on simulated data. (Left column) Power to differentiate between sweep and neutrality by comparing the probability of a sweep under sweep simulations with the same probability in simulations of neutrality when using varying  $\gamma$  penalties, wavelet types, and demographic histories. (Top row confusion matrices) Confusion matrices comparing classification rates of *SURFDAWave* when trained and tested with the CEU demographic history when using Daubechies' least-Asymmetric wavelets to estimate spatial distributions of summary statistics when using either  $\gamma = 1$ ,  $\gamma = 0$ , or  $\gamma$  chosen through cross validation (see *Training the models*). (Middle row confusion matrices) Confusion matrices comparing classification rates of *SURFDAWave* when trained and tested with the CEU demographic history when using Haar wavelets to estimate spatial distributions of summary statistics when using either  $\gamma = 1$ ,  $\gamma = 0$ , or  $\gamma$  chosen through cross validation. (Bottom) Confusion matrix showing classification rates of *SURFDAWave* when trained and tested with constant demographic history when using Daubechies' least-Asymmetric wavelets.
