# Supplementary material for: Learning the properties of adaptive regions with functional data analysis
Source: PubMed Central journal article supplement (PMC7480868; doi:10.1371/journal.pgen.1008896), 2020-08-27
Supplement: pgen.1008896.s027.pdf [file pgen.1008896.s027.pdf]

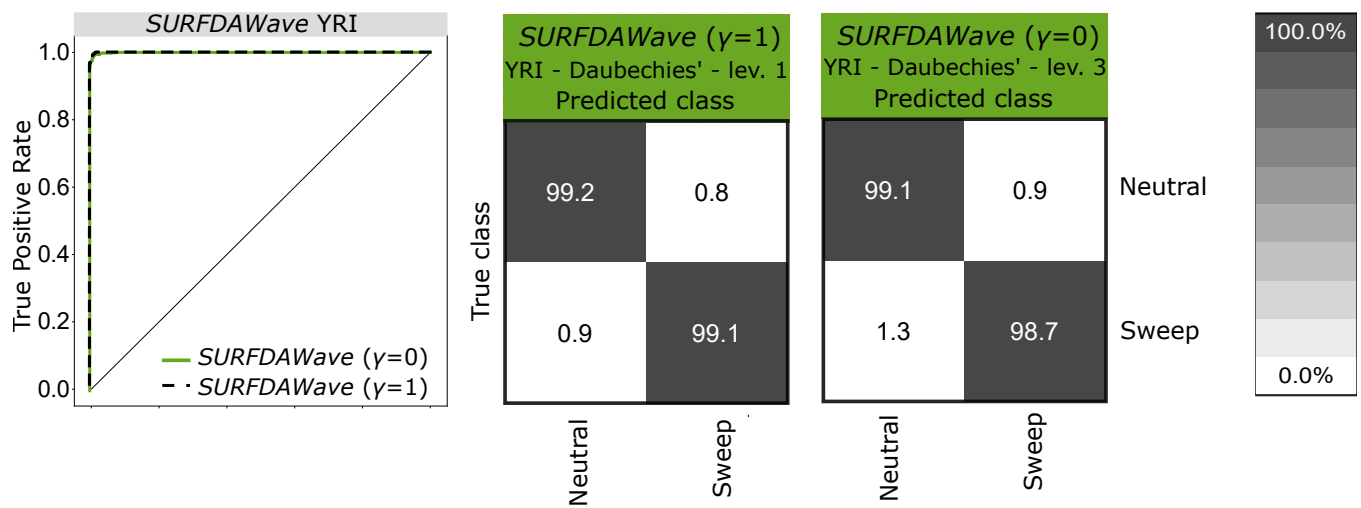

Figure S7: *SURFDAWave* performance on simulated data trained and tested with simulations conducted with YRI demographic history to differentiate between sweeps and neutrality. *SURFDAWave* parameters using Daubechies' least-Asymmetric wavelets to estimate spatial distributions of summary statistics and using  $\gamma = 1$  or  $\gamma = 0$ . (Left) Power to differentiate between sweep and neutrality by comparing the probability of a sweep under sweep simulations with the same probability in simulations of neutrality when using varying  $\gamma$  penalties in *SURFDAWave*. (Right confusion matrices) Classification rates using *SURFDAWave* when using  $\gamma = 1$  and  $\gamma = 0$ .
