# Supplementary material for: Learning the properties of adaptive regions with functional data analysis
Source: PubMed Central journal article supplement (PMC7480868; doi:10.1371/journal.pgen.1008896), 2020-08-27
Supplement: pgen.1008896.s031.pdf [file pgen.1008896.s031.pdf]

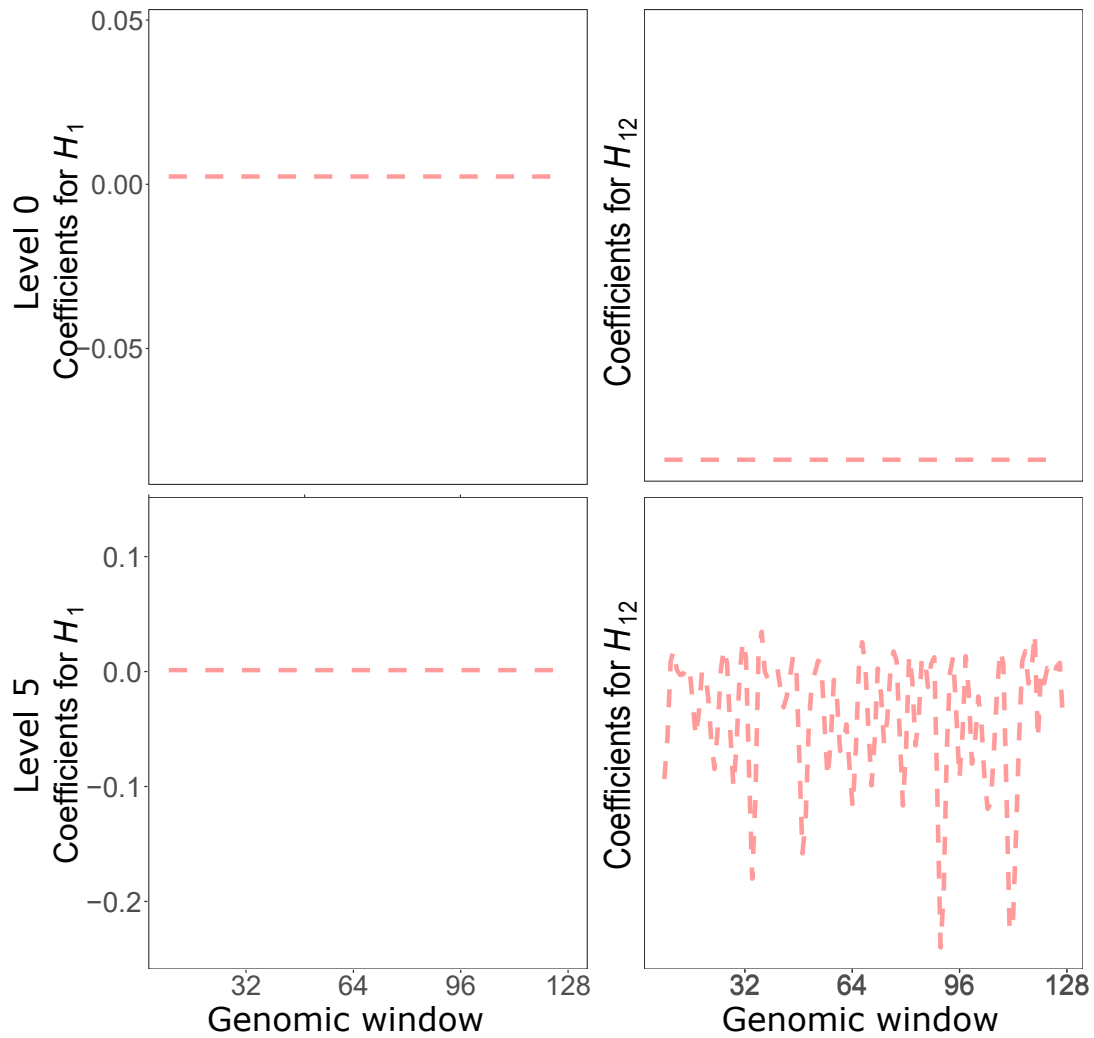

Figure S11: Reconstructed wavelets from regression coefficients ( $\beta_s$ ) in sweep vs. neutrality scenarios for summary statistics  $H_1$  and  $H_{12}$  showing difference between discrete wavelet transform at level 0 and level 5. Using Daubechies' least-Asymmetric wavelets and  $\gamma = 1$ .
