# Supplementary material for: Learning the properties of adaptive regions with functional data analysis
Source: PubMed Central journal article supplement (PMC7480868; doi:10.1371/journal.pgen.1008896), 2020-08-27
Supplement: pgen.1008896.s039.pdf [file pgen.1008896.s039.pdf]

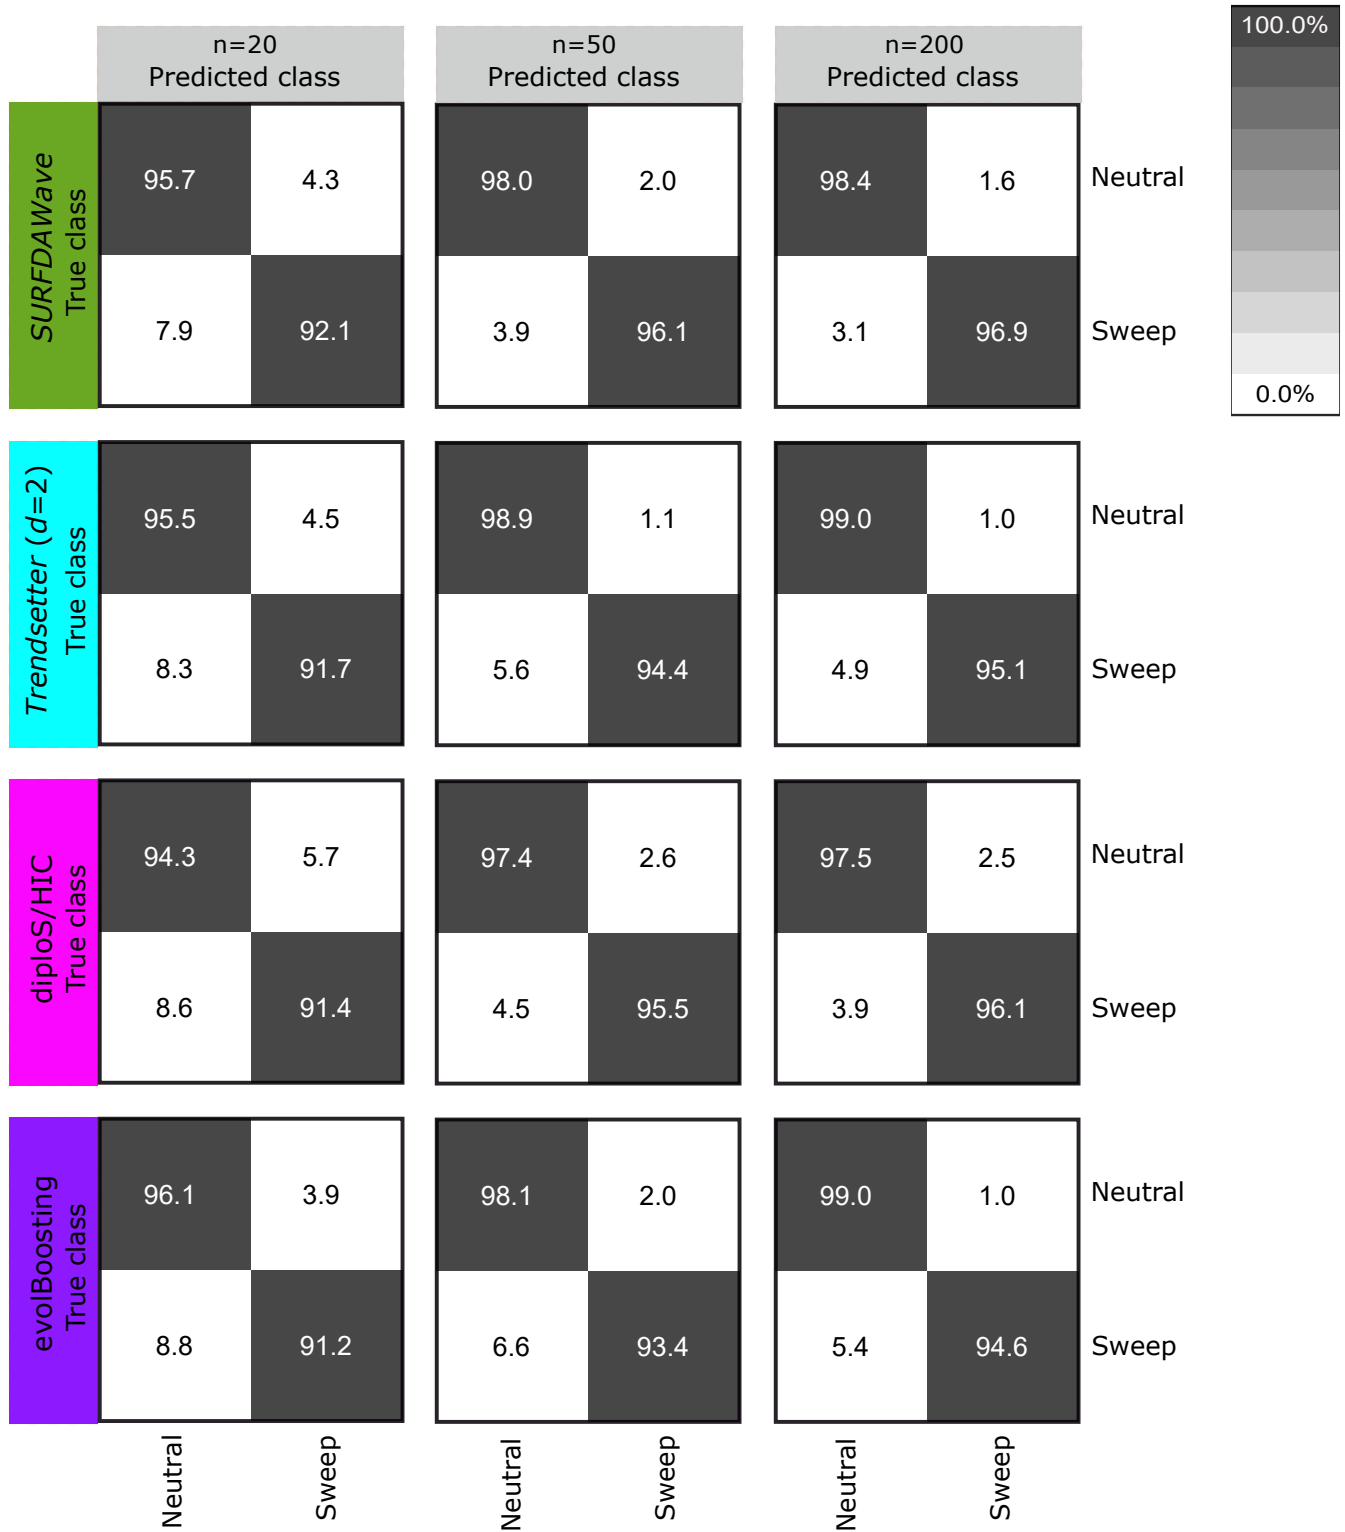

Figure S19: Confusion matrices showing the effect sample size has on classification rates. We train and test *SURFDAWave*, *Trendsetter*, diploS/HIC, and evolBoosting classifiers to differentiate sweeps and neutrality using sample sizes of  $n = 20, 50,$  and  $200$  haploid genomes. *SURFDAWave* results shown are using Daubechies' least-asymmetric wavelets to estimate spatial distributions of summary statistics and  $\gamma$  and levels are chosen through cross validation (see *Training the models*). Summary statistics  $\hat{\pi}, H_1, H_{12}, H_2/H_1,$  and frequency of the first, second, third, fourth, and fifth most common haplotypes used by both *Trendsetter* and *SURFDAWave*.
