# Supplementary material for: Learning the properties of adaptive regions with functional data analysis
Source: PubMed Central journal article supplement (PMC7480868; doi:10.1371/journal.pgen.1008896), 2020-08-27
Supplement: pgen.1008896.s040.pdf [file pgen.1008896.s040.pdf]

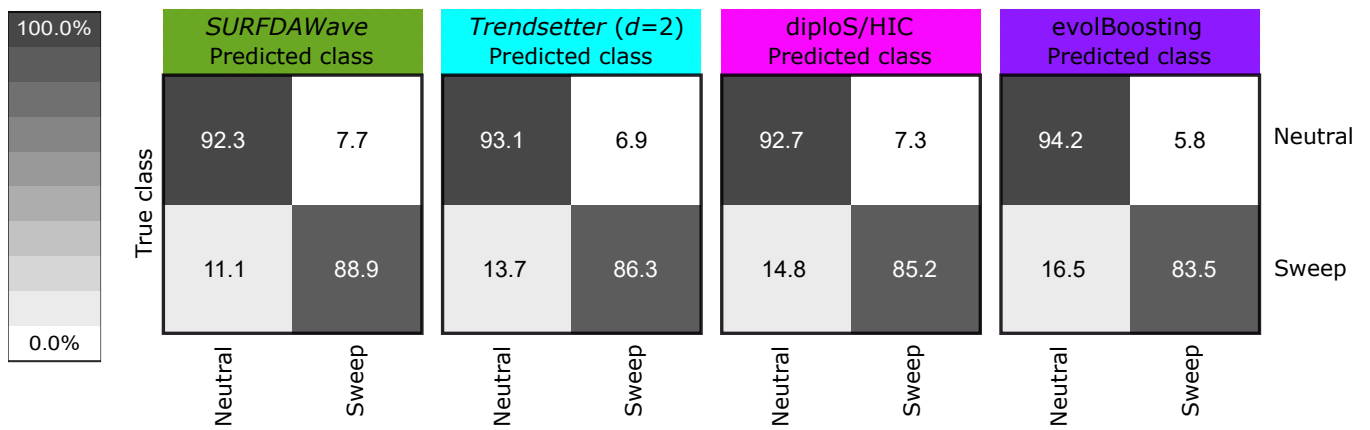

Figure S20: Confusion matrices comparing classification rates when *SURFDAWave*, *Trendsetter*, diploS/HIC, and evolBoosting are trained and tested using simulations conducted under *Drosophila* population parameters to differentiate between sweeps and neutrality. *SURFDAWave* results shown are using Daubechies' least-asymmetric wavelets to estimate spatial distributions of summary statistics and  $\gamma$  and levels are chosen through cross validation (see *Training the models*). Summary statistics  $\hat{\pi}$ ,  $H_1$ ,  $H_{12}$ ,  $H_2/H_1$ , and frequency of the first, second, third, fourth, and fifth most common haplotypes used by both *Trendsetter* and *SURFDAWave*.
