# Supplementary material for: Learning the properties of adaptive regions with functional data analysis
Source: PubMed Central journal article supplement (PMC7480868; doi:10.1371/journal.pgen.1008896), 2020-08-27
Supplement: pgen.1008896.s046.pdf [file pgen.1008896.s046.pdf]

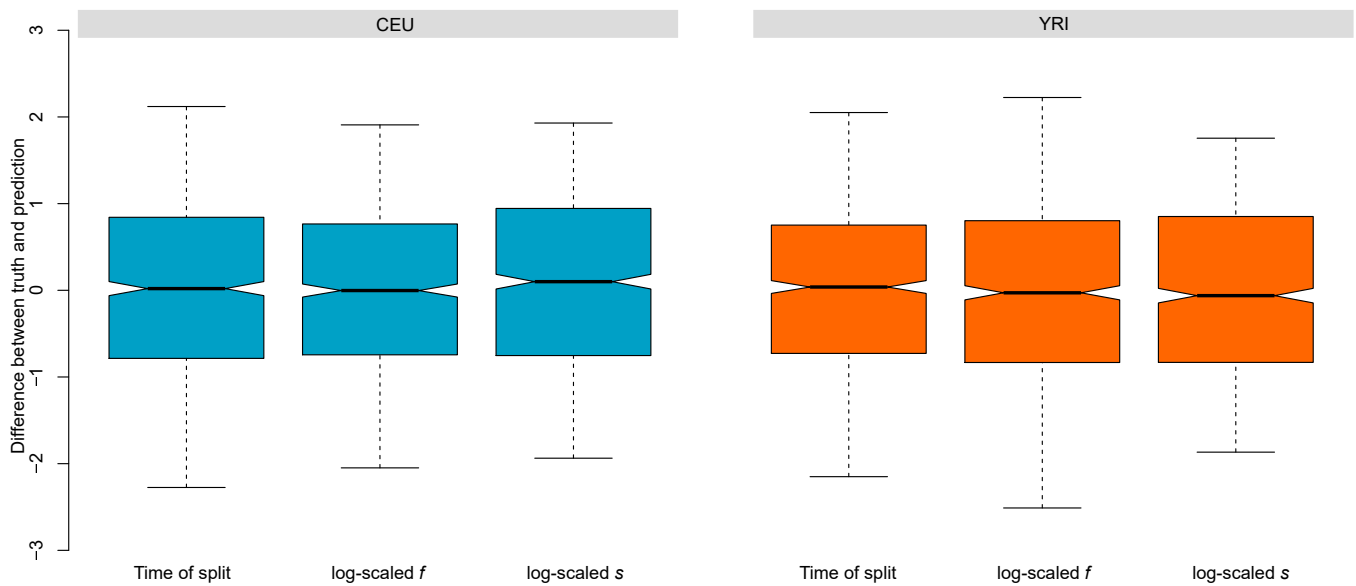

Figure S26: Difference between standardized predicted and actual selection parameters with *SURFDATE* for the CEU and YRI demographic models. (Left box plot) Difference in prediction and truth of log scaled time at which donor and recipient populations split. (Middle box plot) Difference in prediction and truth of log scaled frequency reached by mutation prior to it becoming beneficial ( $f$ ). (Right box plot) Difference in prediction and truth of log scaled selection coefficient ( $s$ ).
